# Supplementary material for: Glycine receptor activation promotes pancreatic islet cell proliferation via the PI3K/mTORC1/p70S6K pathway
Source: JCI journal article supplement (doi:10.1172/jci.insight.178754), 2025-04-21
Supplement: sd1 [file 1]

**Table S1 Primer sequences used for qPCR**

| <b>Gene</b>            | <b>Forward</b>        | <b>Reverse</b>         |
|------------------------|-----------------------|------------------------|
| <i>B-actin</i> (mouse) | CTGAATGGCCCAGGTCTGA   | CCCTGGCTGCCTCAACAC     |
| <i>GLRA1</i> (mouse)   | CTGGCCATCTCGACAGGAAA  | AGCTAAGGTACCGCGGACAG   |
| <i>GLRA2</i> (mouse)   | TTGACCTGACCATGATGCCC  | TAGTGCCGGTACATTCTG     |
| <i>GLRA3</i> (mouse)   | AACAAACAGTGC GCGATCTC | GTTGGGTCTGATTCTTGCATCA |
| <i>GLRA4</i> (mouse)   | GGAGAGGAAAGAGCGCTCAA  | AGGAAGAGGCTTGCTGGAAC   |
| <i>GLRB</i> (mouse)    | ACCCAGACTCAAGCTACCT   | GACGTCTCCATCCCGAAAGA   |
| <i>KCNJ11</i> (mouse)  | TCGCCACAAGAACATTCGA   | AGGAGTGGATGCTTGTGACG   |
| <i>B-actin</i> (human) | GTGCTATCCCTGTACGCCTC  | AGGTAGTCAGTCAGGTCCCG   |
| <i>GLRA1</i> (human)   | ACAGCAATACTCTTCGCGCT  | GTAAAGGGAGGCGGGGAAC    |
| <i>GLRA2</i> (human)   | AATGATTCACGGCTGGCGTA  | TCCGTAGCAATTTGTTGTCAGT |
| <i>GLRA3</i> (human)   | TGGAGCGACAAATGGGATACT | GGAAGCTCGTGATCCTGAACT  |
| <i>GLRB</i> (human)    | CTGAATCCTGCTATGGTCACC | AGCACACTTTAAACGAGCTGA  |
| <i>KCNJ11</i> (human)  | GCTCCTCCCAACCCAATTCA  | ACTTCTGGAGCCACAGACG    |

**Table S2: Donor Information**

| <b>Donor#</b>   | <b>Islet bank<br/>ID</b> | <b>Source</b> | <b>Sex</b> | <b>Age</b> | <b>BMI</b> | <b>HbA1c<br/>(%)</b> | <b>Islet<br/>Particle<br/>index</b> |
|-----------------|--------------------------|---------------|------------|------------|------------|----------------------|-------------------------------------|
| <b>Donor 1</b>  | R330                     | ADI           | Female     | 39         | 24.2       | 5.1                  | 1.09                                |
| <b>Donor 2</b>  | R338                     | ADI           | Male       | 30         | 25.5       | 5.3                  | 0.79                                |
| <b>Donor 3</b>  | R340                     | ADI           | Male       | 36         | 23.3       | 5.3                  | 1.02                                |
| <b>Donor 4</b>  | R341                     | ADI           | Male       | 42         | 30.0       | /                    | 1.24                                |
| <b>Donor 5</b>  | R356                     | ADI           | Female     | 45         | 29.7       | 5.1                  | 0.63                                |
| <b>Donor 6</b>  | R413                     | ADI           | Male       | 41         | 33.6       | 5.6                  | 0.83                                |
| <b>Donor 7</b>  | H2309                    | AIDP          | Male       | 32         | 22.9       | 5.6                  | 0.811                               |
| <b>Donor 8</b>  | H2331                    | AIDP          | Male       | 36         | 25.0       | 5.7                  | /                                   |
| <b>Donor 9</b>  | H2346                    | AIDP          | Male       | 59         | 29.5       | 5.9                  | /                                   |
| <b>Donor 10</b> | H2366                    | AIDP          | Male       | 60         | 23.8       | 5.6                  | /                                   |
| <b>Donor 11</b> | UHN210616                | UHN           | Female     | 39         | 34.8       | /                    | /                                   |
| <b>Donor 12</b> | R326                     | ADI           | Male       | 26         | 27         | 5.5                  | 1.52                                |

ADI, Alberta Diabetes Institute IsletCore; AIDP, Alberta Islet Distribution Program;

UHN, University Health Network.

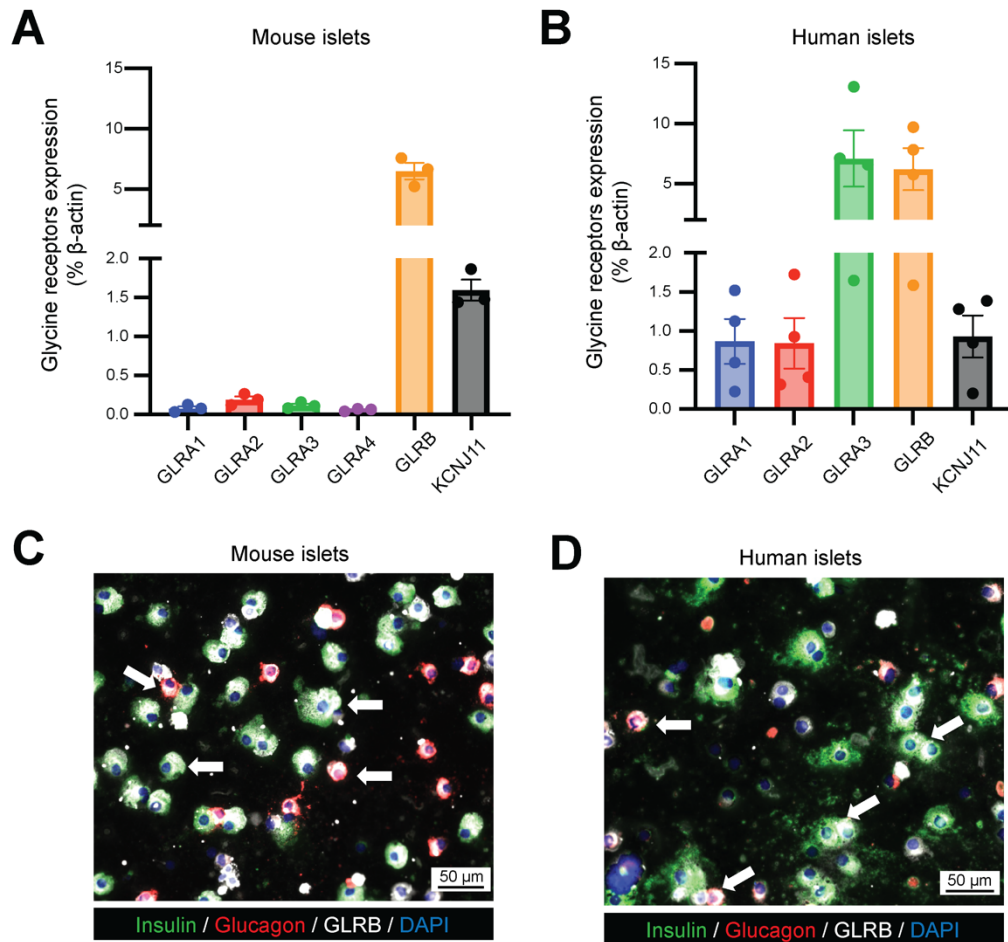

**Figure S1. Glycine receptor expression in primary mouse and human islets.** A) Mouse and B) human islet qPCR of glycine receptor subunits (Mouse: *GLRA1-4* and *GLRB*; Human: *GLR1-3* and *GLRB*). *KCNJ11*, a gene encoding Kir6.2 subunit of the ATP-sensitive potassium channel in the pancreatic  $\beta$ -cell, was used as positive control. C) and D) Representative images of GLRB positive cells in dispersed mouse and human islets. Data are depicted as mean  $\pm$  SEM.

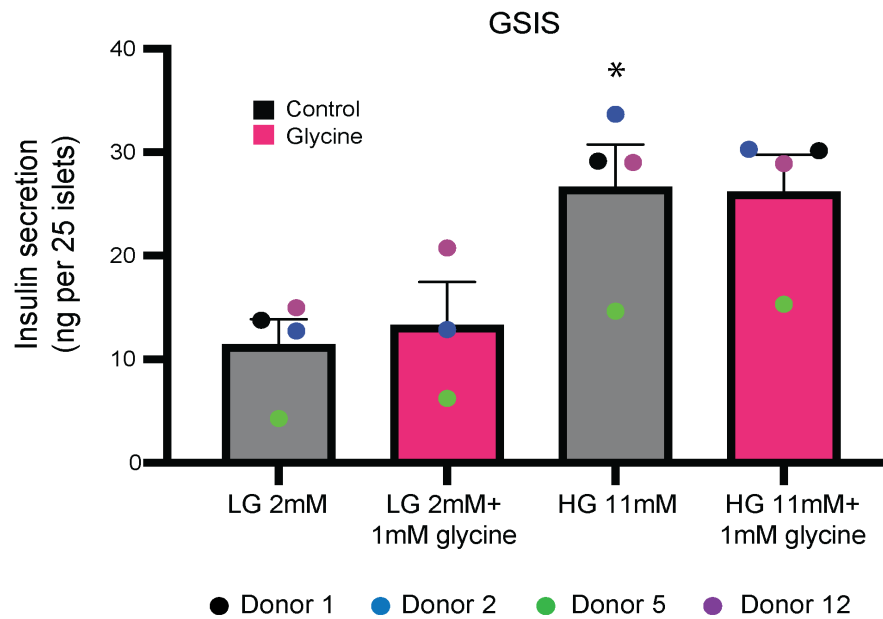

**Figure S2. Glycine had no effect on glucose-stimulated insulin secretion (GSIS) in human islets.** Vehicle or 1mM glycine was added during a GSIS assay performed on human islets. Insulin secretion under the treatment of low glucose (2mM), high glucose (11mM) with or without 1mM glycine was measured. Data are depicted as mean  $\pm$  SEM. Statistical significance was determined by using unpaired t-test, with Holm-Bonferroni correction applied for multiple comparisons. \*p-value < 0.05 compared to the LG control group. LG, low glucose; HG, high glucose.

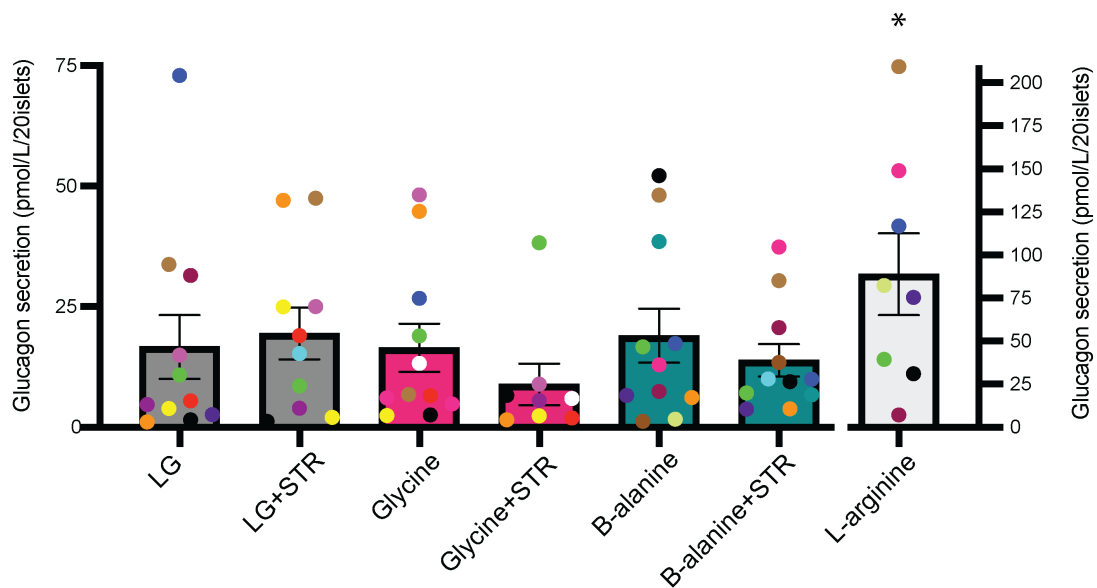

**Figure S3. Glycine and  $\beta$ -alanine had no effect on mouse islet glucagon secretion *in***

***vitro*.** Mouse islets were treated in low glucose condition (2mM) with 1 mM glycine

or 1 mM  $\beta$ -alanine, in the presence or absence of strychnine. A 5 mM L-arginine

treatment served as a positive control. Data are expressed as mean  $\pm$  SEM, with N =

8–12 per group. Each solid-colored circle represents the same islet preparation under

different treatment conditions.

Statistical significance was determined by using Mann-Whitney

test or unpaired t-test dependent on dataset normality test, with Holm-

Bonferroni correction applied for multiple comparisons. \*p-value<005, compared to

the LG control group. LG, low glucose; STR, strychnine.

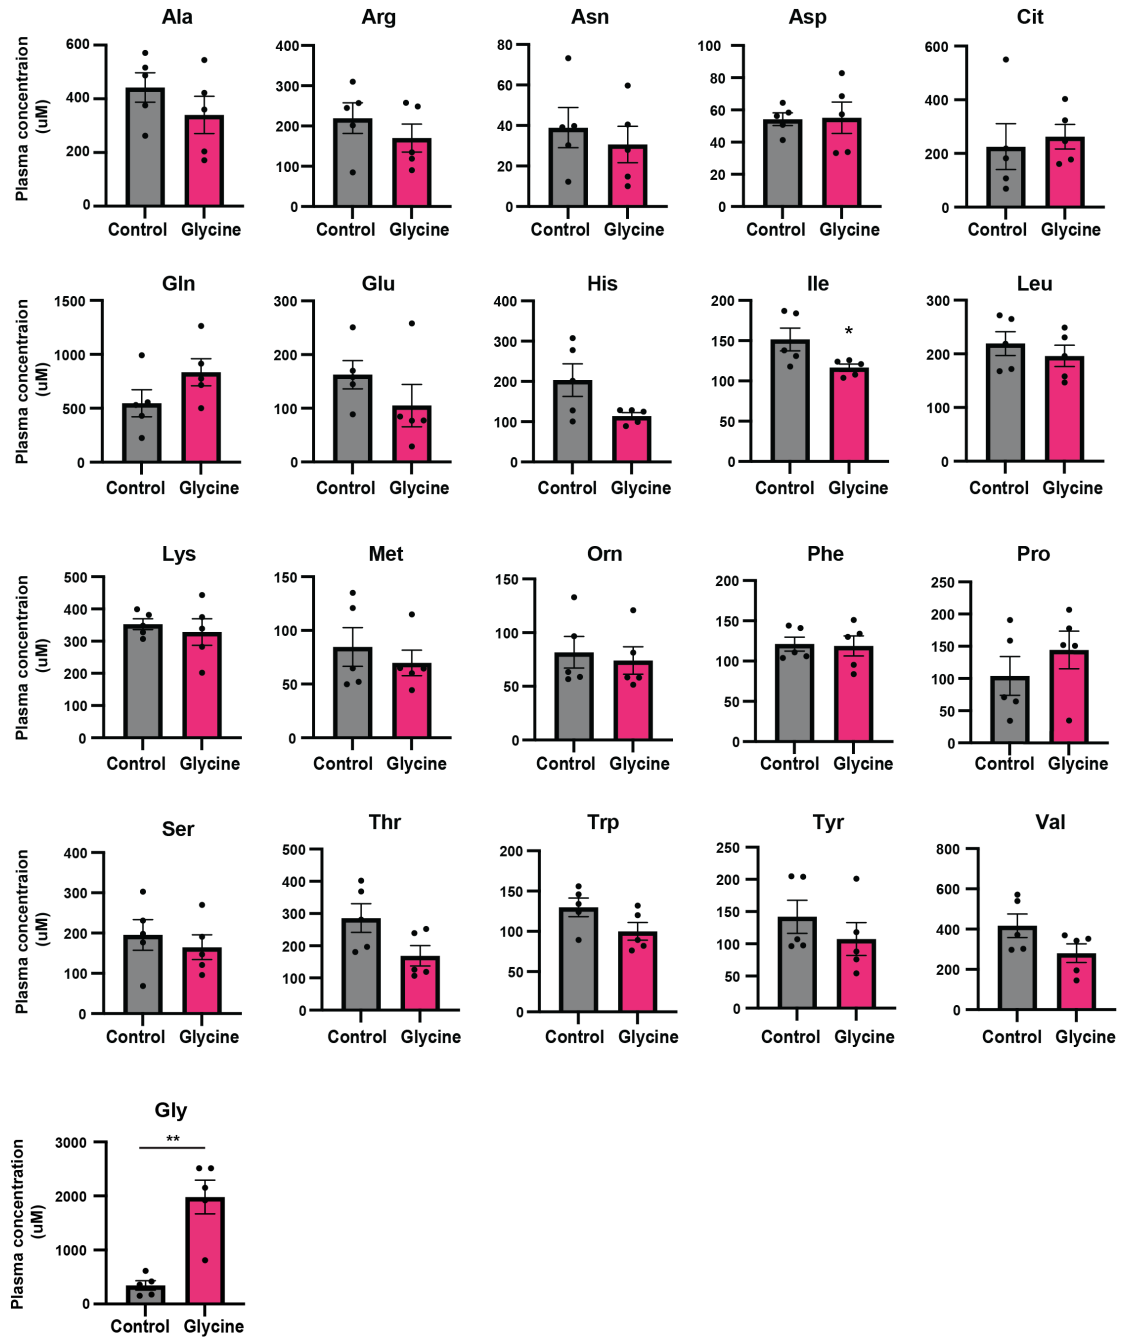

**Figure S4. Glycine administration had no effect on other circulating amino acid levels**

*in vivo*. Mice were treated with 2% glycine or normal drinking water for 12 weeks and circulating amino acid levels were assessed using targeted metabolomics. Data are presented as mean  $\pm$  SEM, with N=5 per group. Statistical significance was determined by using Mann-Whitney test or unpaired t-test dependent on dataset normality test.

\*P<0.05, \*\*P<0.01, compared to the control group.
